# Supplementary material for: Identification of G-quadruplex forming sequences in three manatee papillomaviruses
Source: PubMed Central journal article supplement (PMC5891072; doi:10.1371/journal.pone.0195625), 2018-04-09
Supplement: pone.0195625.s001.pdf [file pone.0195625.s001.pdf]

**S1 Table. Sequences, locations, and descriptors for putative G4 identified on TmPV1.** Note that all sequences are identified on a reference genome. Thus, G4 sequences on the reverse DNA strand are identified by searching for C-tracts.

| G4 Sequence Name* | Genome Start | Genome End | Sequence Code** | Sequence                                                                |
|-------------------|--------------|------------|-----------------|-------------------------------------------------------------------------|
| TmPV1_1_E2_R      | 2707         | 2725       | 4:1:1           | CCAGCCTATTCCAACAACC                                                     |
| TmPV1_2_E2/E4_R   | 3173         | 3235       | 11:8:2          | CCAGACGGACCCGCACCCACTACCA<br>CCGGAGACCTATCCGAGCCATCCCC<br>TGGATCCATCCCC |
| TmPV1_3_E2/E4_R   | 3246         | 3291       | 9:6:2           | CCCCACCGACACACCCGTCACCCA<br>TACCGAGGAGTCCATAACCCCC                      |
| TmPV1_4_E2/E4_R   | 3326         | 3354       | 6:3:1           | CCACCCACCAATACCGGGGGAACCA<br>CACC                                       |
| TmPV1_5_L2_R      | 4249         | 4266       | 4:1:1           | CCGGATATCCCGGCCACC                                                      |
| TmPV1_6_L2_R      | 4371         | 4386       | 4:1:1           | CCTTCACCCCTCCACC                                                        |
| TmPV1_7_L2_R      | 4558         | 4592       | 7:4:1           | CCACGTGCCACCAGCACGCCGGAAG<br>GCCCTCCTCC                                 |
| TmPV1_8_L2_R      | 4742         | 4769       | 6:3:1           | CCACCCTACCAACCACTACCCCGCA<br>CCC                                        |
| TmPV1_9_L2_R      | 5261         | 5308       | 8:5:2           | CCACTGATACCAGCCCCCCTATAACA<br>CCCTCTAACCCACCTACAATCC                    |
| TmPV1_10_L1_R     | 5431         | 5467       | 8:5:2           | CCTACCCCCCACCCCTGCCGCCCGC<br>ATCCTCAATACC                               |
| TmPV1_11_L1_R     | 5939         | 5952       | 4:1:1           | CCCCACCTCTGCC                                                           |
| TmPV1_12_L1_R     | 6635         | 6646       | 4:1:1           | CCCCCTCCCTCC                                                            |
| TmPV1_13_L1_R     | 6851         | 6879       | 5:2:1           | CCTCGTCCAGGCACCTCTACCTCTA<br>CCCC                                       |
| TmPV1_14_NCR_R    | 7215         | 7232       | 4:1:1           | CCCCCGCGGCACCTCACC                                                      |
| TmPV1_15_NCR_R    | 7355         | 7385       | 7:4:1           | CCTTCAACCTGGCATCCCTCCACCTC<br>CGACC                                     |
| TmPV1_1_E7_F      | 554          | 564        | 4:1:1           | GGTGGAGGAGG                                                             |
| TmPV1_2_E7_F      | 575          | 595        | 5:2:1           | GGAAAAGGCGGAGGATAGTGG                                                   |
| TmPV1_3_E1_F      | 923          | 955        | 5:2:1           | GGAAAGAGGCAGACAGGCATAAAC<br>GGGACTTGG                                   |
| TmPV1_4_E1_F      | 1005         | 1016       | 4:1:1           | GGGGGTGGGAGG                                                            |
| TmPV1_5_E1_F      | 1168         | 1181       | 4:1:1           | GGTGGGGGGCAGGG                                                          |
| TmPV1_6_E1_F      | 1353         | 1366       | 4:1:1           | GGATTGGGTGGCGG                                                          |
| TmPV1_7_E1_F      | 1959         | 1971       | 4:1:1           | GGAGGGGGATTGG                                                           |
| TmPV1_8_E1/E2_F   | 2529         | 2543       | 5:2:1           | GGAGGAGGAGGATGG                                                         |
| TmPV1_9_E2/E4_F   | 3501         | 3522       | 4:1:1           | GGACATTGGGAAGGGGATCTGG                                                  |
| TmPV1_10_E2_F     | 3684         | 3714       | 7:4:1           | GGAAGTGGTCAGGGTTCGGGGGCTA<br>AGGAGGG                                    |
| TmPV1_11_L2_F     | 4039         | 4085       | 9:6:2           | ***GGTAGATTGGGTATTGGGACTGG<br>GTCGGGTGCAGGGGGAAAGTGGAGG                 |

| G4 Sequence Name* | Genome Start | Genome End | Sequence Code** | Sequence                                    |
|-------------------|--------------|------------|-----------------|---------------------------------------------|
| TmPV1_12_L2_F     | 4114         | 4152       | 8:5:2           | GGTGGCGCCAGGTTGGAGCCTGGCG<br>GAGCAGTGGTCAGG |
| TmPV1_13_L1_F     | 5995         | 6032       | 7:4:1           | GGATGGCGATATGGCGGATCTAGGC<br>TTCGGTGCCATGG  |
| TmPV1_14_L1_F     | 6610         | 6627       | 4:1:1           | GGAGGATTGGCATATAGG                          |

\*The G4 sequence name consists of genome\_number on genome\_region\_DNA strand.

\*\* The number of G-tracts: number of G4 starting locations: number of G4 that can form simultaneously

\*\*\*The sequence highlighted in red is the single sequence identified with the capability to form a G4 with three G-tetrads.
