# Supplementary material for: Identification of G-quadruplex forming sequences in three manatee papillomaviruses
Source: PubMed Central journal article supplement (PMC5891072; doi:10.1371/journal.pone.0195625), 2018-04-09
Supplement: pone.0195625.s003.pdf [file pone.0195625.s003.pdf]

**S3 Table. Sequences, locations, and descriptors for putative G4 identified on TmPV4.** Note that all sequences are identified on a reference genome. Thus, G4 sequences on the reverse DNA strand are identified by searching for C-tracts.

| G4 Sequence Name* | Genome Start | Genome End | Sequence Code** | Sequence                                                                                                                                     |
|-------------------|--------------|------------|-----------------|----------------------------------------------------------------------------------------------------------------------------------------------|
| TmPV4_1_E2/E4_R   | 3273         | 3303       | 7:4:1           | CCGCCGCCCCAGCCACCGCGCCCAC<br>AGTCCC                                                                                                          |
| TmPV4_2_E2/E4_R   | 3323         | 3340       | 4:1:1           | CCCTCCTCTGACCATCCC                                                                                                                           |
| TmPV4_3_E2/E4_R   | 3354         | 3393       | 6:3:1           | CCCCAAGGACCCCATCGCCACGGCC<br>GGCGGCCGGAGCACC<br>CCCGACCCTGGACCCGTGCTCCTCAA<br>CCAGTGGGCCCCGCCCCCAACCCCGA<br>GACCAGTGACTCCGACACCTCAGAC<br>GCC |
| TmPV4_4_E2/E4_R   | 3509         | 3586       | 13:10:3         | CCACCACCTCCACCACCTACACCAA<br>CCCCAACACCC                                                                                                     |
| TmPV4_5_E2/E4_R   | 3777         | 3812       | 9:6:2           | CCTACGGTCCTTCCTGGATTCC                                                                                                                       |
| TmPV4_6_E2/E4_R   | 3887         | 3908       | 4:1:1           | CCTGTAGACCCACAAATACCTGTTCC                                                                                                                   |
| TmPV4_7_L2_R      | 4270         | 4295       | 4:1:1           | C                                                                                                                                            |
| TmPV4_8_L2_R      | 4456         | 4477       | 5:2:1           | CCACCAGTGCAGCCAGACCCCC                                                                                                                       |
| TmPV4_9_L2_R      | 4548         | 4568       | 4:1:1           | CCTTCCATTGTCCCGTTAACC                                                                                                                        |
| TmPV4_10_L2_R     | 4620         | 4633       | 5:2:1           | CCCCCACCCCCACC                                                                                                                               |
| TmPV4_11_L2_R     | 4682         | 4711       | 7:4:1           | CCTTCCATCCTCGGACCCTCCCATCC<br>AACC                                                                                                           |
| TmPV4_12_L2_R     | 5423         | 5444       | 4:1:1           | CCCGAGTTCCACCCAATATACC                                                                                                                       |
| TmPV4_13_L2_R     | 5601         | 5633       | 6:3:1           | CCGGAAGACCATAGCACCCCCAGAA<br>TACCTACC                                                                                                        |
| TmPV4_14_L1_R     | 6271         | 6294       | 5:2:1           | CCTCCCCCGCAGGGCGCCTGTCCC                                                                                                                     |
| TmPV4_15_L1_R     | 7143         | 7162       | 4:1:1           | CCCCCTTGGCCGTAAATTCC                                                                                                                         |
| TmPV4_16_L1_R     | 7205         | 7221       | 4:1:1           | CCTCTCCATCTACCTCC                                                                                                                            |
| TmPV4_17_NCR_R    | 7538         | 7563       | 6:3:1           | CCATCCGCAACCGCCTCCGCTCTTCC                                                                                                                   |
| TmPV4_1_E1_F      | 1170         | 1186       | 4:1:1           | GGAGGGGGATAGTGGGG<br>GGTAGATAGGGGGGCTGTACGGCA                                                                                                |
| TmPV4_2_E1_F      | 1278         | 1327       | 9:6:2           | GGGAGGCGGGGAACAACAGGGTGT<br>GG                                                                                                               |
| TmPV4_3_E1_F      | 1561         | 1576       | 4:1:1           | GGAACGGAAGGGCGGG                                                                                                                             |
| TmPV4_4_E1_F      | 2064         | 2080       | 5:2:1           | GGAGGGGGACTGGCGGG                                                                                                                            |
| TmPV4_5_E1/E2_F   | 2634         | 2654       | 5:2:1           | GGAGGACGAGGGGGAAGATGG                                                                                                                        |
| TmPV4_6_E2_F      | 2748         | 2771       | 4:1:1           | GGACTTTGGTCAGAAAGGAACAGG                                                                                                                     |
| TmPV4_7_E2/E4_F   | 3087         | 3110       | 5:2:1           | GGAGAAAGGTGGAGGGTGCAGTGG                                                                                                                     |
| TmPV4_8_E2/E4_F   | 3312         | 3322       | 4:1:1           | GGTGGGGGCGG                                                                                                                                  |
| TmPV4_9_E2/E4_F   | 3375         | 3395       | 5:2:1           | GGCCGGCGGCCGGAGCACCGG                                                                                                                        |
| TmPV4_10_E2/E4_F  | 3477         | 3493       | 4:1:1           | GGCACCCGGGGGACGGG                                                                                                                            |

| G4 Sequence Name* | Genome Start | Genome End | Sequence Code** | Sequence                                                                                                                      |
|-------------------|--------------|------------|-----------------|-------------------------------------------------------------------------------------------------------------------------------|
| TmPV4_11_E2/E4_F  | 3623         | 3650       | 5:2:1           | GGAGCCCGGTCCAGAGGAGGTAGA<br>GGGG<br>GGGGGCCGAGGCAGAGGAGGCAGC<br>GGCAGGGCCCAAGGGCACCGAGGA                                      |
| TmPV4_12_E2/E4_F  | 3659         | 3769       | 24:21:6         | GCAGGAGAAGGAGGAGGAGGAGGA<br>CGAGGAGGACGAGGAGGAGGACGA<br>GGAGGACGAGGAGGG                                                       |
| TmPV4_13_E2/E4_F  | 3840         | 3857       | 4:1:1           | GGCTGCACGGCGAGGGGG                                                                                                            |
| TmPV4_14_E2_F     | 4093         | 4111       | 4:1:1           | GGGGGAAGGGCCTAGTGGG                                                                                                           |
| TmPV4_15_L2_F     | 4243         | 4257       | 4:1:1           | GGGCTACGGTGGAGG                                                                                                               |
| TmPV4_16_L2_F     | 4395         | 4421       | 6:3:1           | GGTTCCGGTGGGGGTGGACGTTTAG<br>GG                                                                                               |
| TmPV4_17_L2_F     | 4638         | 4657       | 5:2:1           | GGCGGAGCGGGTCTCGGTGG                                                                                                          |
| TmPV4_18_L1_F     | 6248         | 6263       | 4:1:1           | GGGATAAGGTGGACGG                                                                                                              |
| TmPV4_19_L1_F     | 6328         | 6353       | 4:1:1           | GGCGACATGGGTGATATAGGGTTCG<br>G<br>GGTGGGTACCAGGTGGGTACCGGGT<br>GCGGTCTTCGGCGGGAGCCCCTGGC<br>GGTCGGGCAACCGGGAACGGTCGTG<br>CAGG |
| TmPV4_20_NCR_F    | 7681         | 7759       | 14:11:3         |                                                                                                                               |

\* The G4 sequence name consists of genome\_number on genome\_region\_DNA strand.

\*\* The number of G-tracts: number of G4 starting locations: number of G4 that can form simultaneously
