# Supplementary material for: Identification of G-quadruplex forming sequences in three manatee papillomaviruses
Source: PubMed Central journal article supplement (PMC5891072; doi:10.1371/journal.pone.0195625), 2018-04-09
Supplement: pone.0195625.s005.pdf [file pone.0195625.s005.pdf]

**S5 Table. Putative E2 binding site sequences and locations on TmPV 1 along with the location and distance of the nearest putative G4 sequence.**

| Region | Sequence               | Genomic Position | Genomic Position of Nearest Upstream G4 (Distance) | Nearest Upstream G4 Sequence            | Genomic Position of Nearest Downstream G4 (Distance) | Nearest Downstream G4 Sequence          |
|--------|------------------------|------------------|----------------------------------------------------|-----------------------------------------|------------------------------------------------------|-----------------------------------------|
| NCR    | ACCC <b>CATGG</b> CGGT | 7203             | 6851 (-352)                                        | CCTCGTCCAGG<br>CACCTCTACCT<br>CTACCCC   | 7215 (+12)                                           | CCCCCGCGGCACC<br>TCACC                  |
| NCR    | ACCG <b>CCTT</b> CGGT* | 7276             | 7215 (-61)                                         | CCCCCGCGGCA<br>CCTCACC                  | 7355 (+79)                                           | CCTTCAACCTGGC<br>ATCCCTCCACCTCC<br>GACC |
| NCR    | ACCG <b>TCTCG</b> GGT  | 7383             | 7355 (-28)                                         | CCTTCAACCTG<br>GCATCCCTCCA<br>CCTCCGACC | -                                                    |                                         |
| NCR    | ACCT <b>AATGA</b> GGT  | 7436             | 7355 (-81)                                         | CCTTCAACCTG<br>GCATCCCTCCA<br>CCTCCGACC | -                                                    |                                         |
| NCR    | ACCG <b>GATT</b> AGGT  | 7585             | 7355 (-230)                                        | CCTTCAACCTG<br>GCATCCCTCCA<br>CCTCCGACC | -                                                    |                                         |

\*Conservative search sequence ACCGNNNNCGGT; Variable nucleotide positions are highlighted in red bold.
